# Supplementary material for: Mild hyperthermia by MR-guided focused ultrasound in an ex vivo model of osteolytic bone tumour: optimization of the spatio-temporal control of the delivered temperature
Source: Springer Nature journal article supplement (doi:10.1186/s12967-019-2094-x), 2019-10-24

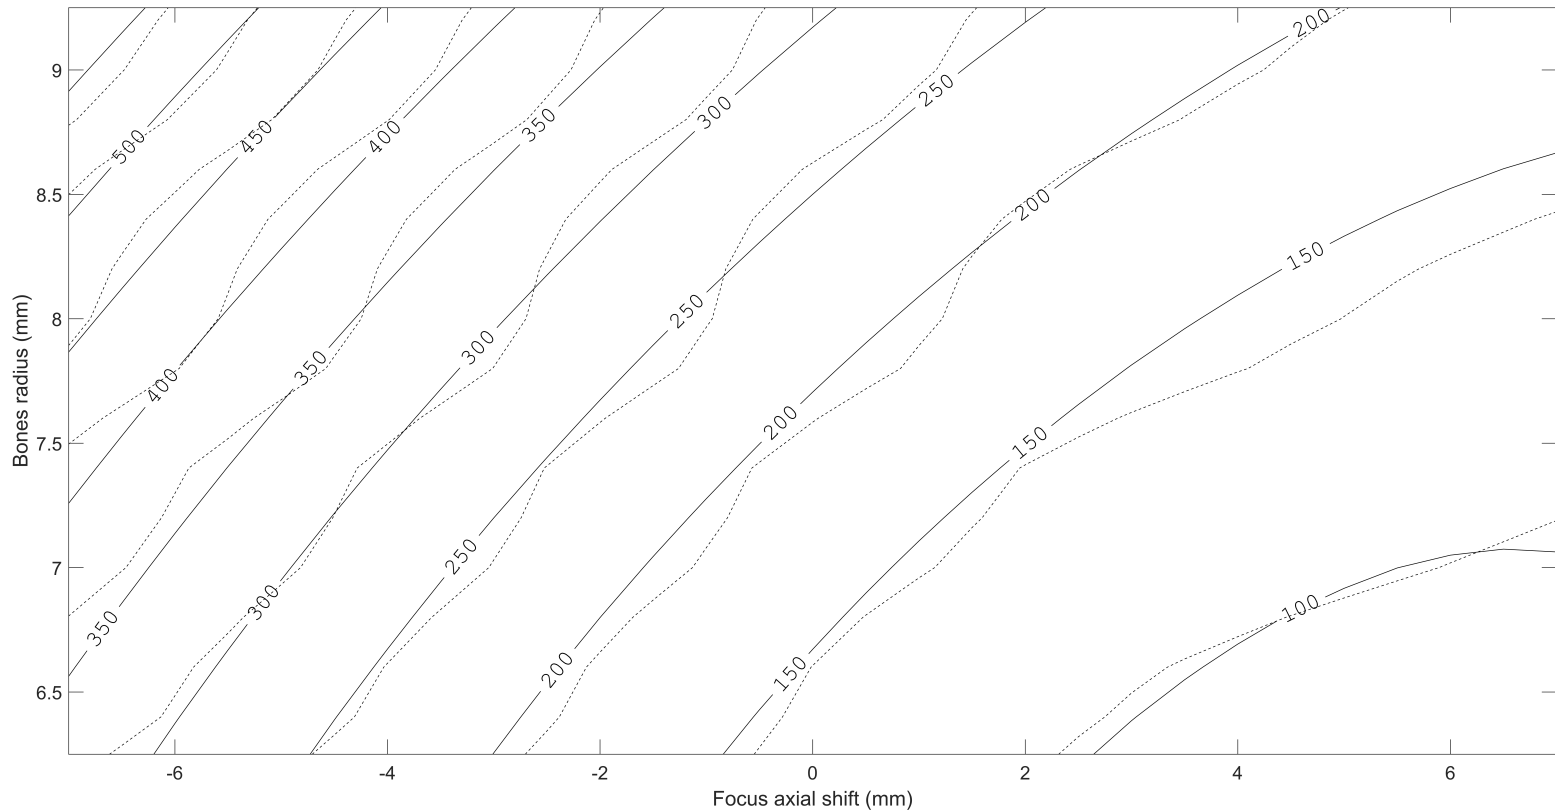

Supplement: MOESM1 [file 17306966]
